# Supplementary material for: Flavokawain B and Doxorubicin Work Synergistically to Impede the Propagation of Gastric Cancer Cells via ROS-Mediated Apoptosis and Autophagy Pathways
Source: Cancers (Basel). 2020 Sep 1;12(9):2475. doi: 10.3390/cancers12092475 (PMC7564097; doi:10.3390/cancers12092475)
Supplement: Supplementary file 1 [file cancers-12-02475-s001.pdf]

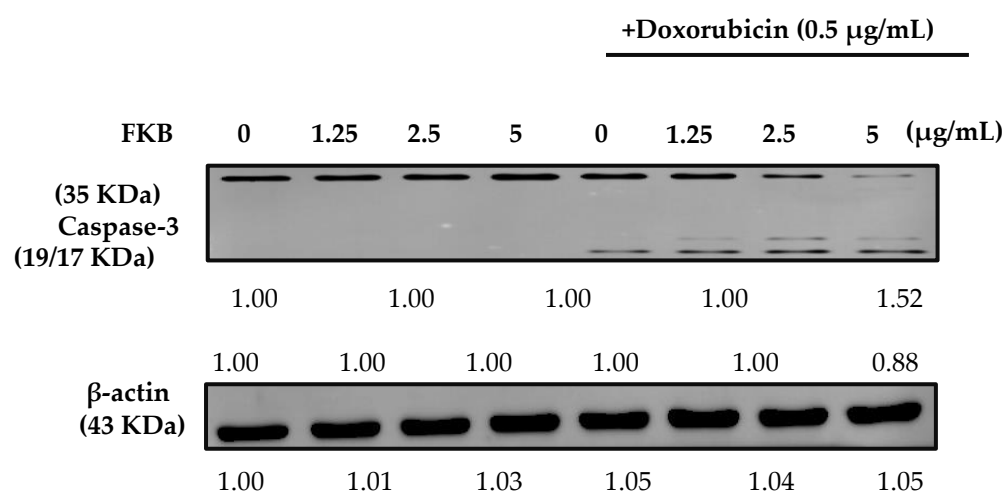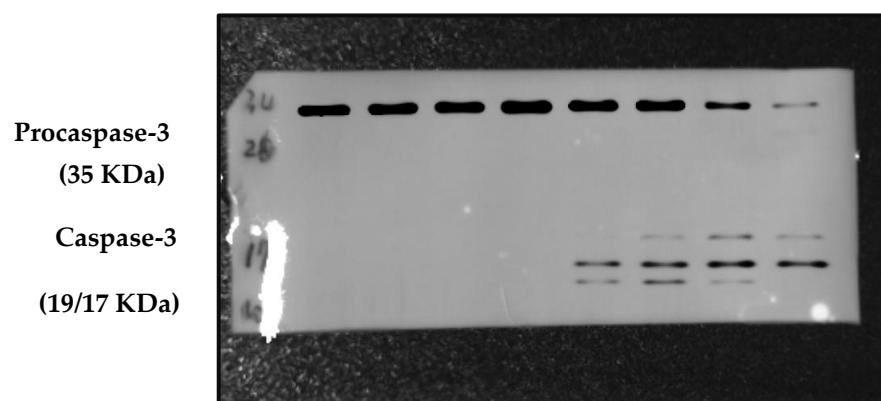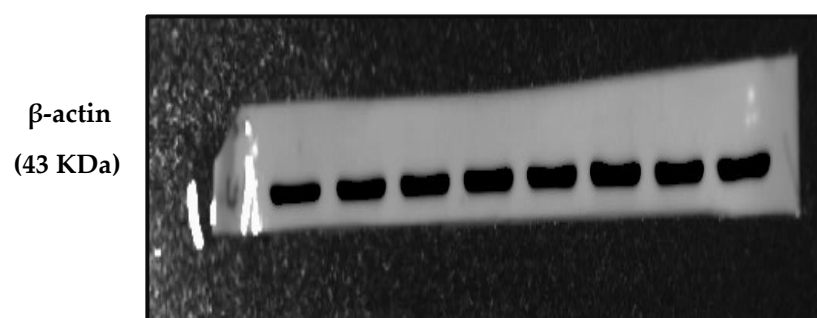

**Figure S1.** Uncropped Western blot images of the protein content of caspase-3, related to Figure 1C.

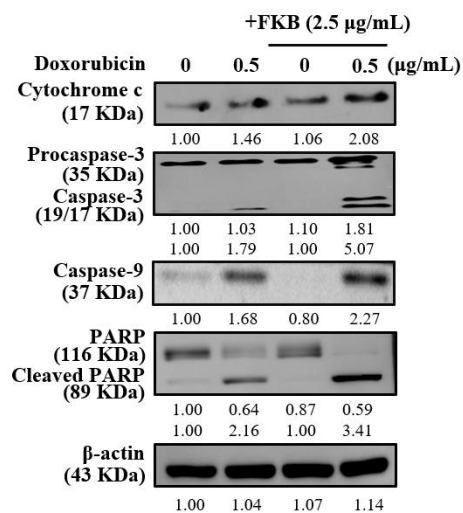

Cytochrome c (17 KDa)

Procaspase-3 (35 KDa)  
Caspase-3 (19/17 KDa)

Caspase-9 (37 KDa)

PARP (116 KDa)  
Cleaved PARP (89 KDa)

β-actin (43 KDa)

**Figure S2.** Uncropped Western blot images of the cytochrome levels c, caspase-3, caspase-9, and PARP, related to Figure 2A.

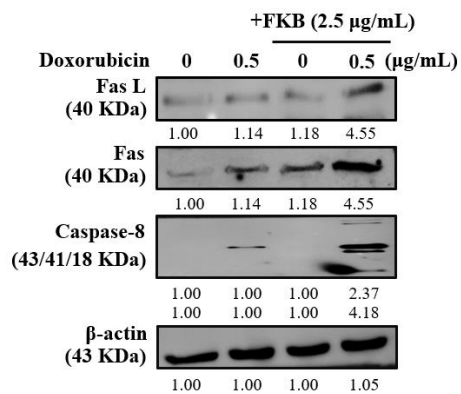

Fas L (40 KDa)

Fas (40 KDa)

Caspase-8 (43/41/18 KDa)

β-actin (43 KDa)

**Figure S3.** Uncropped Western blot images of the protein levels FasL, Fas, and caspase-8, related to Figure 2C.

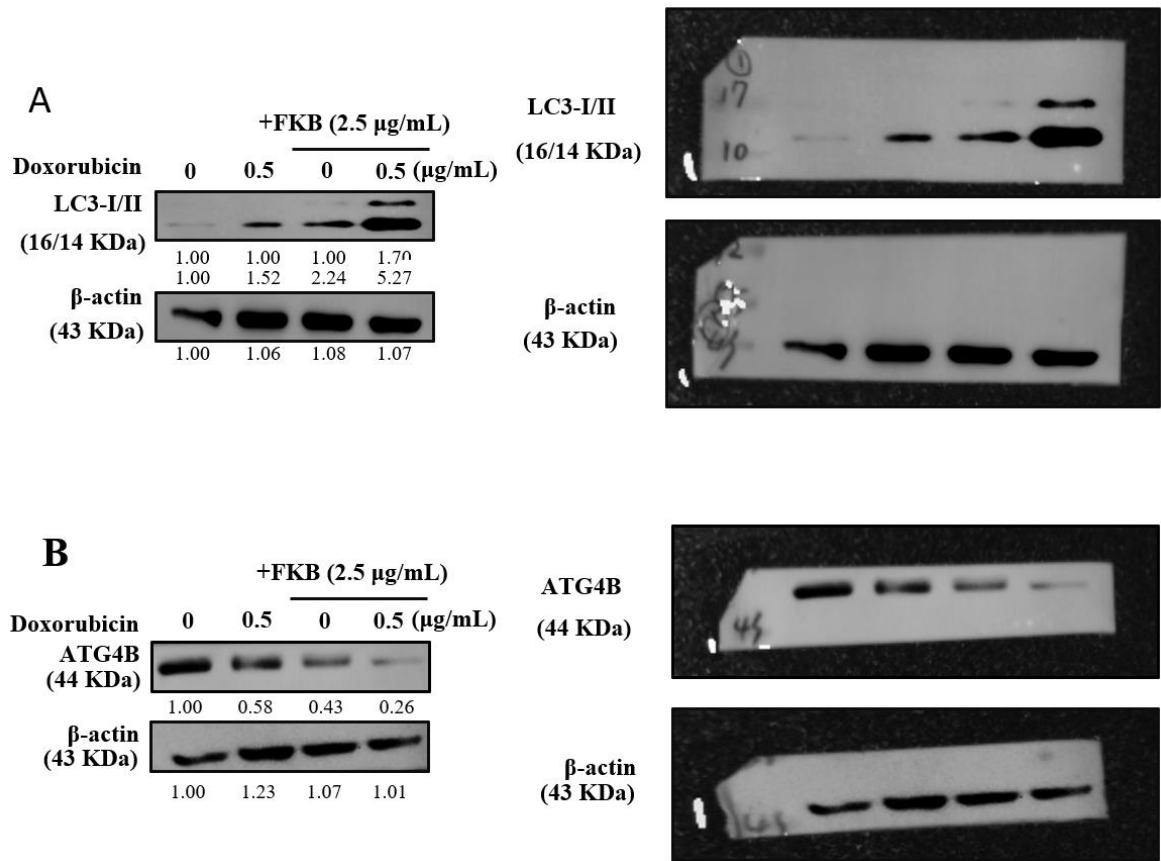

**Figure S4.** (A) Uncropped Western blot images of the conversion of LC3-I to LC3-II, related to Figure 4A. (B) Uncropped Western blot images of protein levels in ATG4B. Densitometric analysis measured relative changes in protein bands with the control as 1.0-fold as shown just below the gel data, related to Figure 4E.

**A**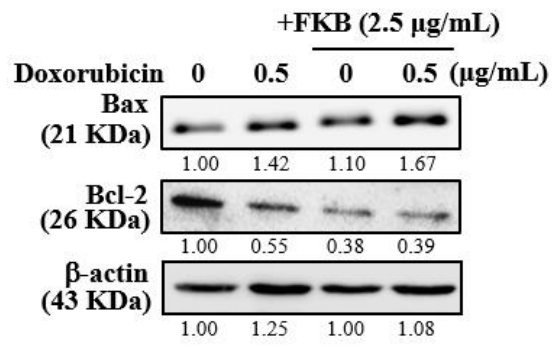**B**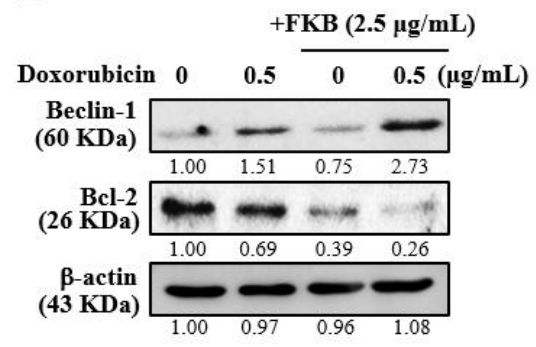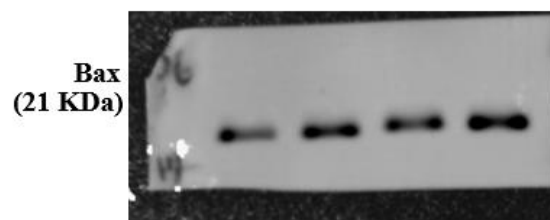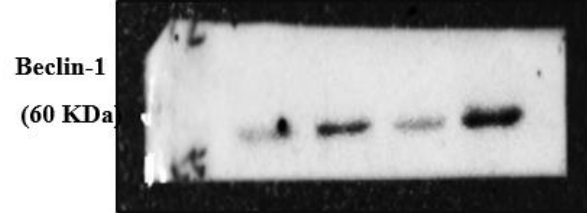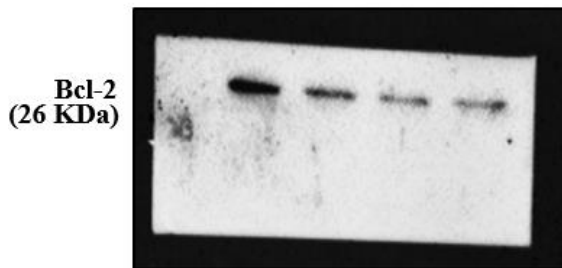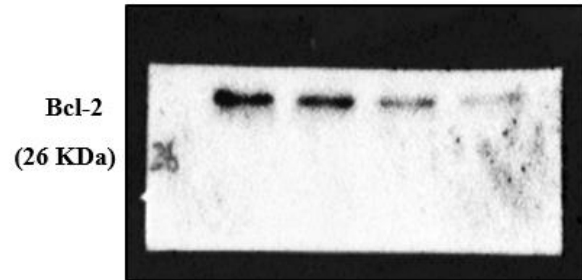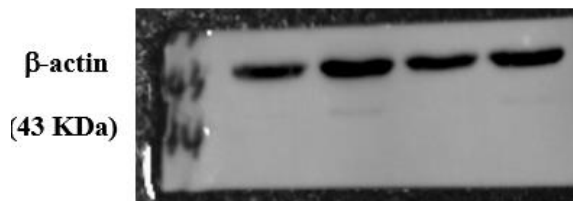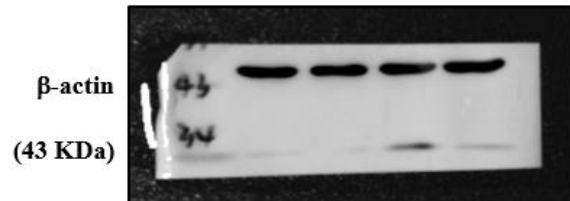

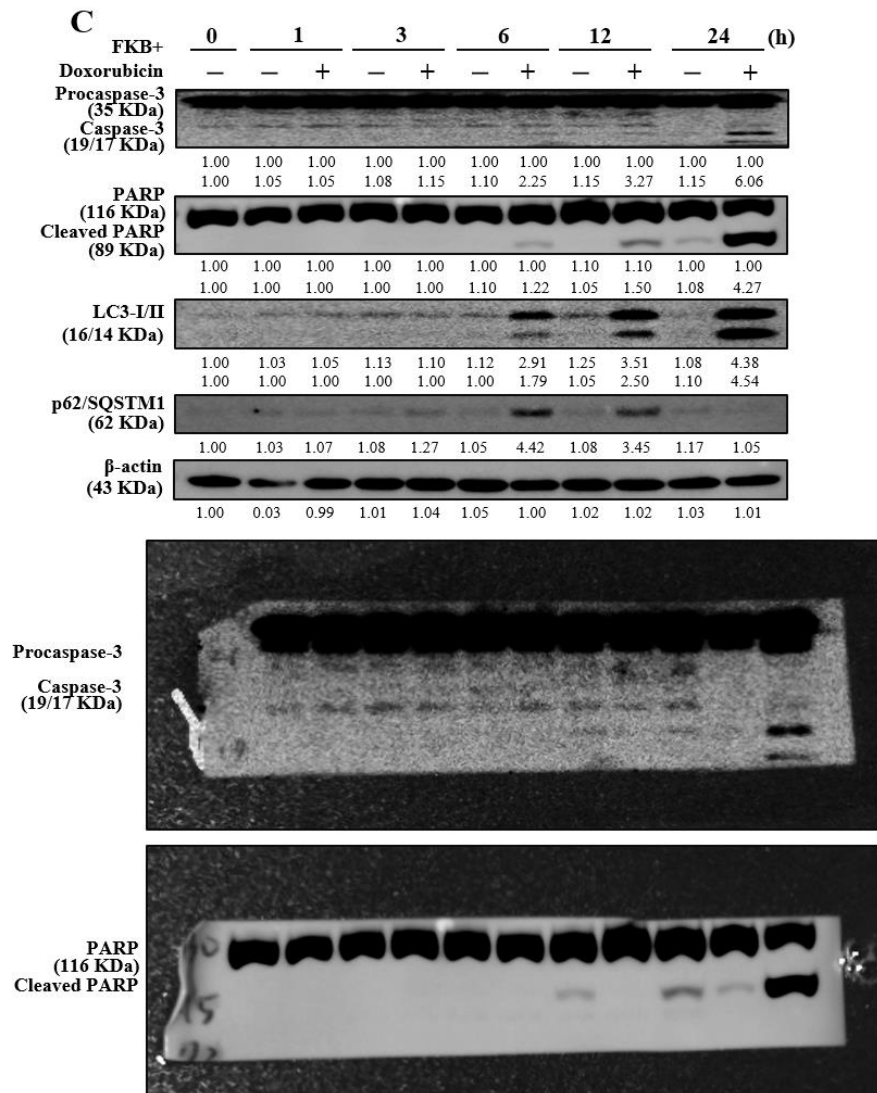

**Figure S5.** (A) Uncropped Western blot images of the proteins Bax and Bcl-2. Relative changes in the Bax/Bcl-2 ratio have been measured using commercially available quantitative software with a control representing 1-fold, related to Figure 6A. (B) Uncropped Western blot images of the Beclin-1 and Bcl-2 proteins expression. Relative changes in the Beclin-1/Bcl-2 ratio were measured by commercially available quantitative software with a control as 1-fold, related to Figure 6B. (C) Uncropped Western blot images of the apoptotic proteins (caspase-3 and PARP) and autophagy markers (LC3-I/LC3-II and p62/SQSTM1), with co-treatment of 0, 1, 3, 6, 12, and 24 h after FKB (2.5  $\mu$ g/mL) and doxorubicin (0.5  $\mu$ g/mL), related to Figure 6C.

**A**

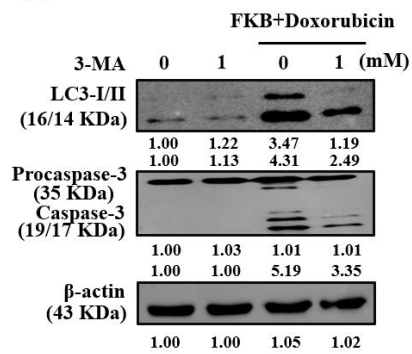

LC3-I/II  
(16/14 KDa)

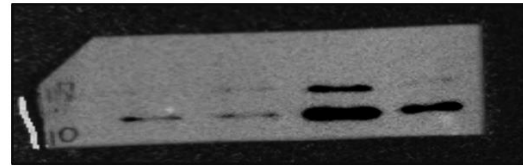

Procaspase-3  
(35 KDa)  
Caspase-3  
(19/17 KDa)

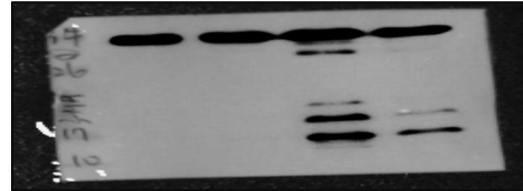

$\beta$ -actin  
(43 KDa)

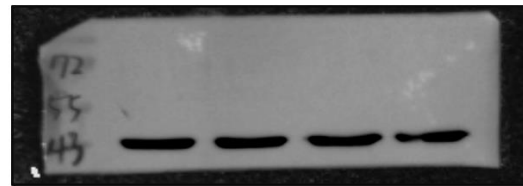

**B**

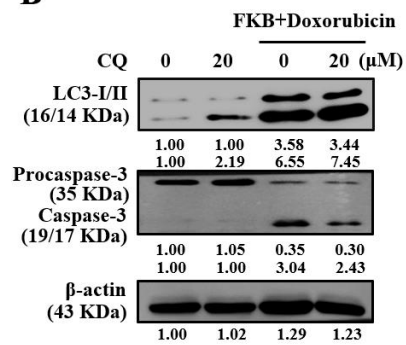

LC3-I/II  
(16/14 KDa)

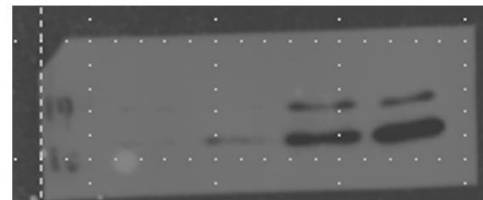

Procaspase-3  
(35 KDa)  
Caspase-3  
(19/17 KDa)

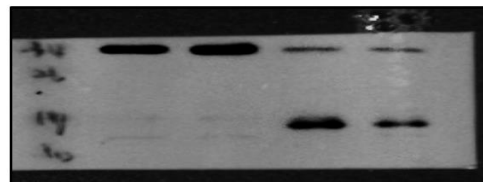

$\beta$ -actin  
(43 KDa)

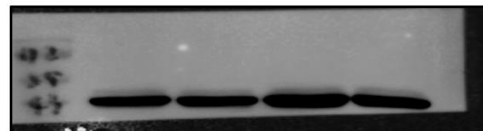

**C**

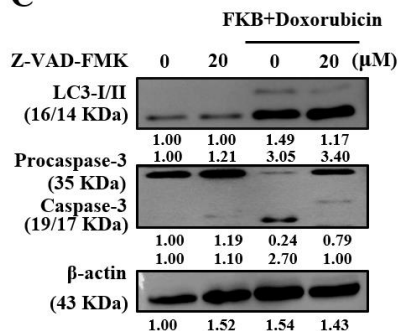

LC3-I/II  
(16/14 KDa)

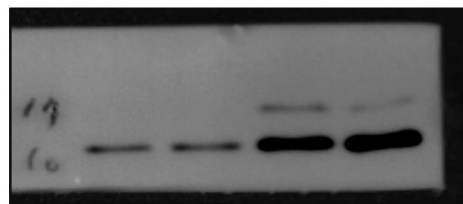

Procaspase-3  
(35 KDa)  
Caspase-3  
(19/17 KDa)

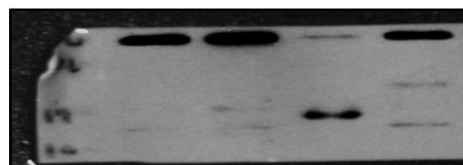

β-actin  
(43 KDa)

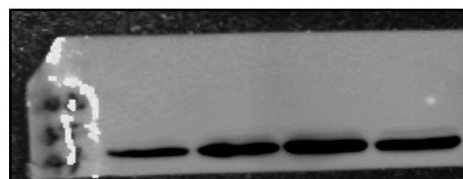

**Figure S6. (A–B)** Uncropped Western blot images of Inhibition of autophagy caused by FKB/doxorubicin suppressed apoptosis. Cells were pretreated with 3-MA (1 mM), related to Figure 7A–B. **(C)** Uncropped Western blot images of the monitored changes in the LC3-I/II and caspase-3 expressions, related to Figure 7C.

**A**

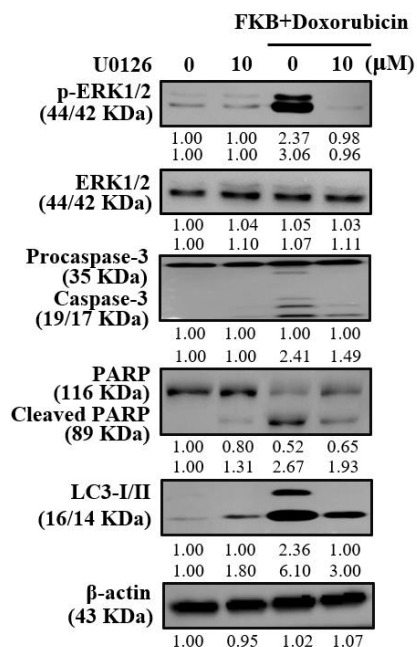

p-ERK1/2  
(44/42 KDa)

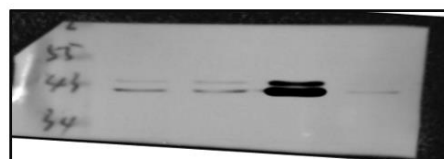

ERK1/2  
(44/42 KDa)

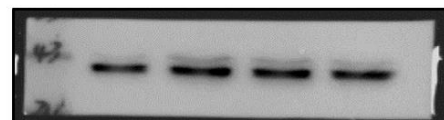

Procaspase-3  
(35 KDa)  
Caspase-3  
(19/17 KDa)

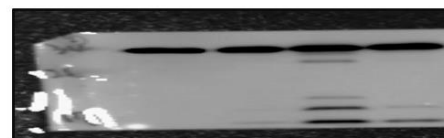

PARP  
(116 KDa)  
Cleaved PARP  
(89 KDa)

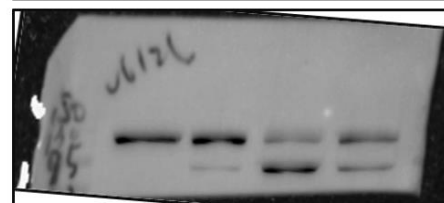

LC3-I/II  
(16/14 KDa)

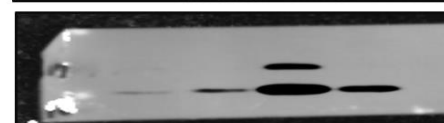

β-actin  
(43 KDa)

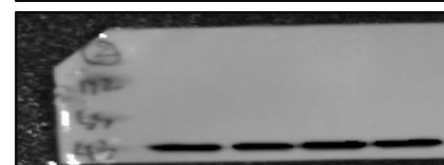

**B**

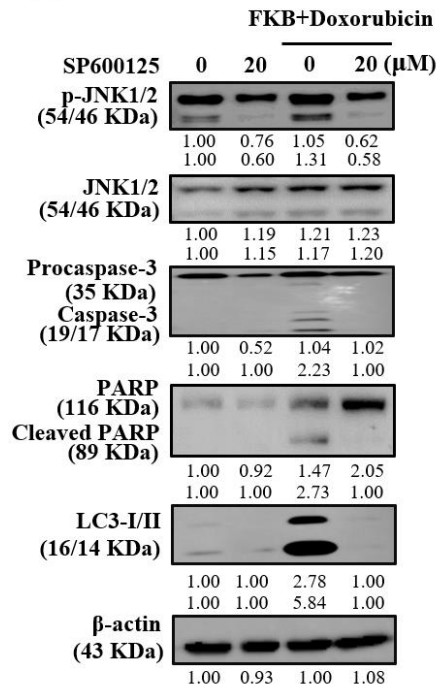

p-JNK1/2  
(54/46 KDa)

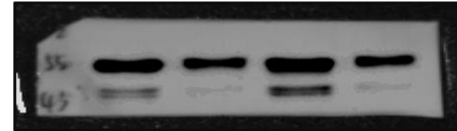

JNK1/2  
(54/46 KDa)

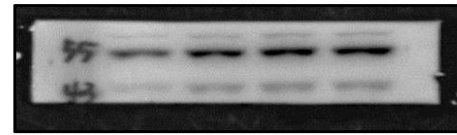

Procaspase-3  
(35 KDa)  
Caspase-3  
(19/17 KDa)

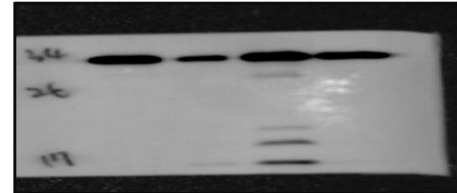

PARP  
(116 KDa)  
Cleaved PARP  
(89 KDa)

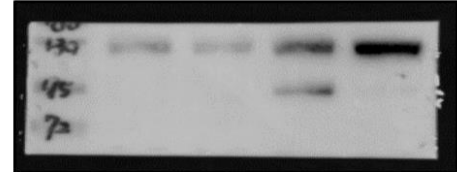

LC3-I/II  
(16/14 KDa)

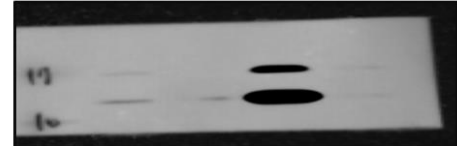

β-actin  
(43 KDa)

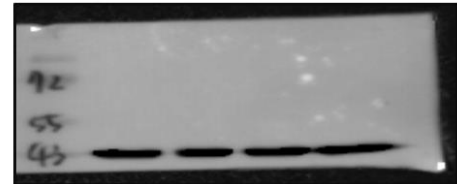

**Figure S7. (A–B)** Uncropped Western blot images of The effect of FKB and doxorubicin co-treatment on expression of LC3-I/II, caspase-3, and PARP was investigated and then changes in total and phosphorylated levels of ERK and JNK were assessed by Western blot, with caspase-3 and PARP expressions, related to Figure 8A–B.

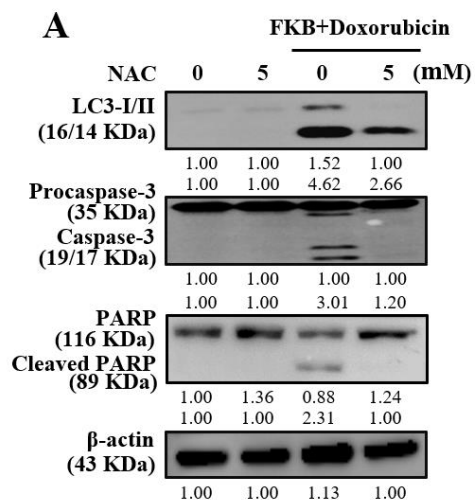

LC3-I/II  
(16/14 KDa)

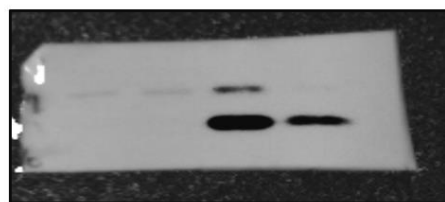

Procaspase-3  
(35 KDa)  
Caspase-3  
(19/17 KDa)

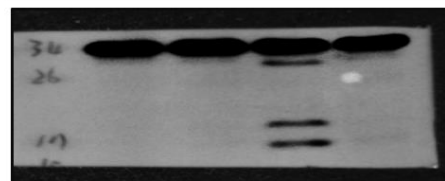

PARP  
(116 KDa)  
Cleaved PARP  
(89 KDa)

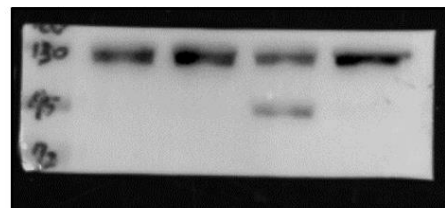

β-actin  
(43 KDa)

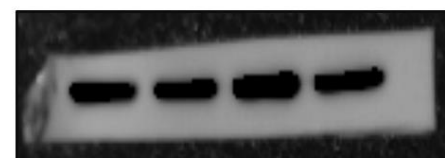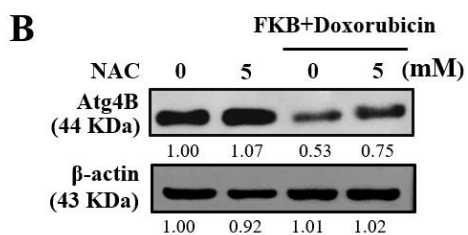

Atg4B  
(44 KDa)

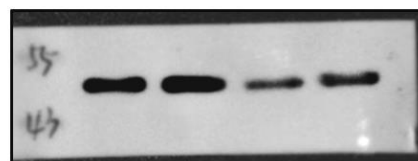

β-actin  
(43 KDa)

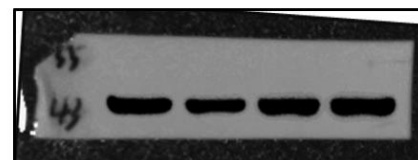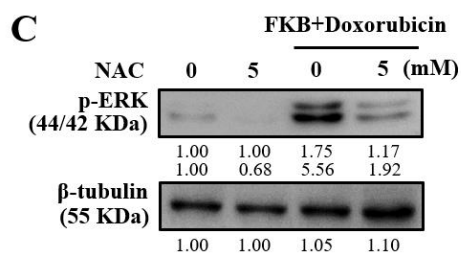

p-ERK  
(44/42 KDa)

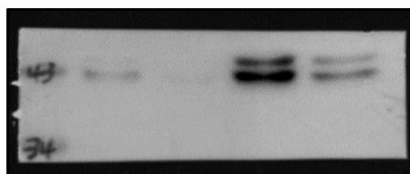

β-tubulin  
(55 KDa)

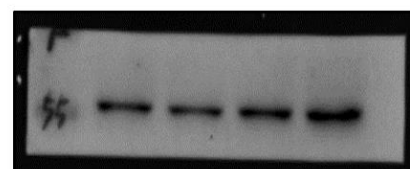

**Figure S8.** (A) Uncropped Western blot images of the terms caspase-3, PARP, and LC3-I/II, related to Figure 10A. (B–C) Uncropped Western blot images of The monitored for the terms ATG4B and p-ERK, related to Figure 10B–C.

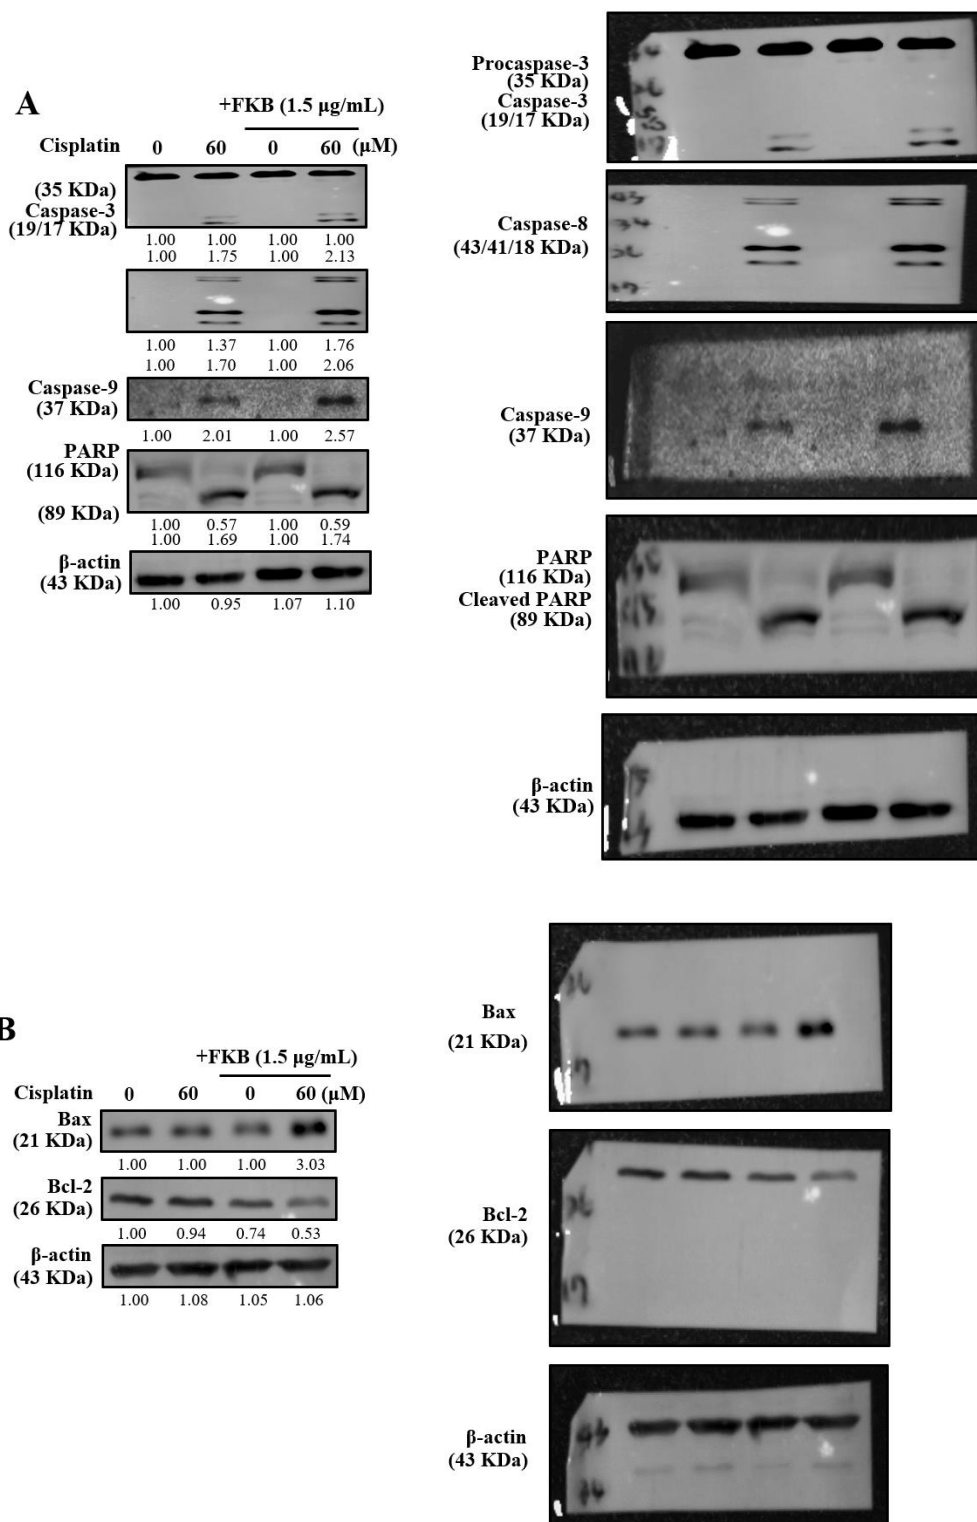

**Figure S9.** (A) Uncropped Western blot images of the the expression caspase-3, caspase-8, caspase-9, and PARP related to Figure 11D. (B) Uncropped Western blot images of The changes in the expression of Bax and Bcl-2 proteins, related to Figure 11E.
